# Supplementary material for: A type 1 diabetes genetic risk score can discriminate monogenic autoimmunity with diabetes from early-onset clustering of polygenic autoimmunity with diabetes
Source: Springer Nature journal article supplement (doi:10.1007/s00125-018-4551-0), 2018-02-07
Supplement: MOESM1 [file 15445184]

# **A type 1 diabetes genetic risk score can discriminate monogenic autoimmunity with diabetes from early-onset clustering of polygenic autoimmunity with diabetes**

Matthew B Johnson<sup>1</sup>, Kashyap E Patel<sup>1</sup>, Elisa De Franco<sup>1</sup>, Jayne A L Houghton<sup>2</sup>, Sian Ellard<sup>1</sup>, Sarah E Flanagan<sup>1</sup>, & Andrew T Hattersley<sup>1</sup>

<sup>1</sup>Institute of Biomedical and Clinical Science, University of Exeter Medical School, Exeter, EX2 5AD, UK

<sup>2</sup>Molecular Genetics, Royal Devon and Exeter Hospital, UK

**Supplementary table S1: SNPs used for the T1-GRS calculation.** Disease associations taken from [www.gwascatalog.com](http://www.gwascatalog.com).

| SNP(s)                  | Gene                 | Odds Ratio | Weight | Autoimmune disease associations                                                                                                                         |
|-------------------------|----------------------|------------|--------|---------------------------------------------------------------------------------------------------------------------------------------------------------|
| rs2187668,<br>rs7454108 | DR3/DR4-DQ8          | 48.18      | 3.87   | Type 1 diabetes,<br>Coeliac disease,<br>Autoimmune thyroid<br>disease,<br>Autoimmune hepatitis                                                          |
|                         | DR3/DR3              | 21.12      | 3.05   |                                                                                                                                                         |
|                         | DR4- DQ8/DR4-<br>DQ8 | 21.98      | 3.09   |                                                                                                                                                         |
|                         | DR4-DQ8/X            | 7.03       | 1.95   |                                                                                                                                                         |
|                         | DR3/X                | 4.53       | 1.51   |                                                                                                                                                         |
| rs1264813               | HLA_A_24             | 1.54       | 0.43   | Type 1 diabetes,<br>Myasthenia gravis                                                                                                                   |
| rs2395029               | HLA_B_5701           | 2.5        | 0.92   | Type 1 diabetes,<br>Psoriasis                                                                                                                           |
| rs3129889               | HLA_DRB1_15          | 14.88      | 2.7    | Type 1 diabetes (protective),<br>Multiple sclerosis                                                                                                     |
| rs2476601               | <i>PTPN22</i>        | 1.96       | 0.67   | Type 1 diabetes,<br>Autoimmune thyroid<br>disease<br>Crohn's disease,<br>Myasthenia gravis,<br>Systemic lupus<br>erythematosus,<br>Rheumatoid arthritis |
| rs689                   | <i>INS</i>           | 1.75       | 0.56   | Type 1 diabetes                                                                                                                                         |
| rs12722495              | <i>IL2RA</i>         | 1.58       | 0.46   | Type 1 diabetes,<br>coeliac disease,<br>Systemic sclerosis                                                                                              |
| rs2292239               | <i>ERBB3</i>         | 1.35       | 0.3    | Type 1 diabetes                                                                                                                                         |
| rs10509540              | C10orf59             | 1.33       | 0.29   | Type 1 diabetes                                                                                                                                         |

**Supplementary table S2: HLA DR3 status of patients with coeliac disease and autoimmune thyroid disease in those with confirmed monogenic autoimmunity and unknown aetiology. X = any HLA allele other than DR3.**

|                | Monogenic autoimmunity (n=37) |                                  |                   | Unknown aetiology (n=42) |                                   |                    |
|----------------|-------------------------------|----------------------------------|-------------------|--------------------------|-----------------------------------|--------------------|
|                | Coeliac disease (n=2)         | Autoimmune thyroid disease (n=6) | Either/both (n=8) | Coeliac disease (n=12)   | Autoimmune thyroid disease (n=17) | Either/both (n=29) |
| <b>DR3/DR3</b> | 0                             | 0                                | 0                 | 4                        | 2                                 | 6                  |
| <b>DR3/X</b>   | 1                             | 2                                | 3                 | 7                        | 9                                 | 16                 |
| <b>X/X</b>     | 1                             | 4                                | 5                 | 1                        | 6                                 | 7                  |
